# Supplementary material for: Ripple-locked coactivity of stimulus-specific neurons and human associative memory
Source: PubMed Central journal article supplement (PMC10917673; doi:10.1038/s41593-023-01550-x), 2024-02-16
Supplement: 41593_2023_1550_MOESM2_ESM.pdf [file 41593_2023_1550_MOESM2_ESM.pdf]

## Reporting Summary

Nature Portfolio wishes to improve the reproducibility of the work that we publish. This form provides structure for consistency and transparency in reporting. For further information on Nature Portfolio policies, see our [Editorial Policies](#) and the [Editorial Policy Checklist](#).

### Statistics

For all statistical analyses, confirm that the following items are present in the figure legend, table legend, main text, or Methods section.

n/a Confirmed

- The exact sample size ( $n$ ) for each experimental group/condition, given as a discrete number and unit of measurement
- A statement on whether measurements were taken from distinct samples or whether the same sample was measured repeatedly
- The statistical test(s) used AND whether they are one- or two-sided  
*Only common tests should be described solely by name; describe more complex techniques in the Methods section.*
- A description of all covariates tested
- A description of any assumptions or corrections, such as tests of normality and adjustment for multiple comparisons
- A full description of the statistical parameters including central tendency (e.g. means) or other basic estimates (e.g. regression coefficient) AND variation (e.g. standard deviation) or associated estimates of uncertainty (e.g. confidence intervals)
- For null hypothesis testing, the test statistic (e.g.  $F$ ,  $t$ ,  $r$ ) with confidence intervals, effect sizes, degrees of freedom and  $P$  value noted  
*Give  $P$  values as exact values whenever suitable.*
- For Bayesian analysis, information on the choice of priors and Markov chain Monte Carlo settings
- For hierarchical and complex designs, identification of the appropriate level for tests and full reporting of outcomes
- Estimates of effect sizes (e.g. Cohen's  $d$ , Pearson's  $r$ ), indicating how they were calculated

*Our web collection on [statistics for biologists](#) contains articles on many of the points above.*

### Software and code

Policy information about [availability of computer code](#)

**Data collection** The memory task was programmed using Unreal Engine 2 (Epic Games, Cary, NC, USA). Neurophysiological data were collected using a NeuroPort System (Blackrock Microsystems, Salt Lake City, UT, USA) and hybrid depth electrodes (Ad-Tech, Racine, WI, USA). See the Methods section for a detailed description.

**Data analysis** Data analyses were carried out in MATLAB 2020b and 2021b (The MathWorks, Inc., Natick, MA, USA), using MATLAB toolboxes and custom MATLAB code. Custom MATLAB code can be downloaded from <https://github.com/NeuroLuke/KunzNatureNeuroscience2024>. Circular statistics were performed using the CircStat toolbox, version 1.21.0.0 (Berens, 2009). Local field potentials were analyzed using FieldTrip (version 20210614). Spike sorting was done using Wave\_Clus 3 (Chaure et al., 2018). MNI coordinates of depth electrodes were determined using PyLocator (v1.0). See the Methods section for a detailed description.

For manuscripts utilizing custom algorithms or software that are central to the research but not yet described in published literature, software must be made available to editors and reviewers. We strongly encourage code deposition in a community repository (e.g. GitHub). See the Nature Portfolio [guidelines for submitting code & software](#) for further information.

## Data

Policy information about [availability of data](#)

All manuscripts must include a [data availability statement](#). This statement should provide the following information, where applicable:

- Accession codes, unique identifiers, or web links for publicly available datasets
- A description of any restrictions on data availability
- For clinical datasets or third party data, please ensure that the statement adheres to our [policy](#)

Data to recreate the figures can be downloaded from <https://github.com/NeuroLuke/KunzNatureNeuroscience2024>. Raw data are not publicly available because they could compromise research participant privacy, but are available upon request from the corresponding author, Lukas Kunz. Any additional information required to reanalyze the data reported in this paper is available from the corresponding author upon request. Requests will typically be answered within one week. Researchers requesting the data will have to sign an agreement that they will not try to de-identify the data and that they will use the data for scientific purposes only.

## Human research participants

Policy information about [studies involving human research participants and Sex and Gender in Research](#).

|                             |                                                                                                                                                                                                                                                                                                                                                                                                                                                                                                                                                                                                                                                                                                                                                                                                                                                                                                                                                                                         |
|-----------------------------|-----------------------------------------------------------------------------------------------------------------------------------------------------------------------------------------------------------------------------------------------------------------------------------------------------------------------------------------------------------------------------------------------------------------------------------------------------------------------------------------------------------------------------------------------------------------------------------------------------------------------------------------------------------------------------------------------------------------------------------------------------------------------------------------------------------------------------------------------------------------------------------------------------------------------------------------------------------------------------------------|
| Reporting on sex and gender | The final sample of participants comprised 30 subjects (16 female and 14 male). The findings of this study, which are about the neural mechanisms underlying associative memory in humans, presumably apply equally to all individuals and sex/gender was therefore not considered in the study design. Sex/gender was determined based on the self-reported data of the subjects.                                                                                                                                                                                                                                                                                                                                                                                                                                                                                                                                                                                                      |
| Population characteristics  | We tested N = 35 human subjects, who were epilepsy patients undergoing treatment for pharmacologically intractable epilepsy at the Freiburg Epilepsy Center, Freiburg im Breisgau, Germany. Of those, 5 patients had to be excluded because of technical issues (n = 1); no hippocampal electrode contacts (n = 2); hippocampal channels that were close to the resection border of a previous surgery (n = 1); and a very low number of ripples (n = 1). This resulted in a final sample of n = 30 subjects (16 female; age range, 19–61 years; mean age $\pm$ SEM, 36 $\pm$ 2 years), contributing a total of n = 41 experimental sessions with intracranial EEG recordings including the left and/or right hippocampus (n = 62 hippocampal bipolar channels). For 20 of these 30 subjects, additional single-neuron recordings from various MTL regions were available (n = 27 sessions; n = 43 hippocampal bipolar channels). Further subject information is presented in Table S1. |
| Recruitment                 | Subjects undergoing invasive electrophysiological recordings for clinical purposes were recruited and consented to participate in this study. Subjects who were capable of and willing to perform the task were recruited. There may be effects of self-selection bias or other biases, but they are unlikely to affect the study results, as this study is about basic neural mechanisms underlying associative memory in humans.                                                                                                                                                                                                                                                                                                                                                                                                                                                                                                                                                      |
| Ethics oversight            | Experimental procedures were approved by the Ethics Committee of the University of Freiburg, Freiburg im Breisgau, Germany, and all participants provided written informed consent.                                                                                                                                                                                                                                                                                                                                                                                                                                                                                                                                                                                                                                                                                                                                                                                                     |

Note that full information on the approval of the study protocol must also be provided in the manuscript.

## Field-specific reporting

Please select the one below that is the best fit for your research. If you are not sure, read the appropriate sections before making your selection.

Life sciences  Behavioural & social sciences  Ecological, evolutionary & environmental sciences

For a reference copy of the document with all sections, see [nature.com/documents/nr-reporting-summary-flat.pdf](https://nature.com/documents/nr-reporting-summary-flat.pdf)

## Life sciences study design

All studies must disclose on these points even when the disclosure is negative.

|                 |                                                                                                                                                                                                                                                                                                                                                                                                                                                                                                                                                                                            |
|-----------------|--------------------------------------------------------------------------------------------------------------------------------------------------------------------------------------------------------------------------------------------------------------------------------------------------------------------------------------------------------------------------------------------------------------------------------------------------------------------------------------------------------------------------------------------------------------------------------------------|
| Sample size     | Our single-neuron analyses were based on 1063 neurons recorded across 27 sessions from 20 subjects. Analyses of hippocampal ripples were based on 62 hippocampal channels across 41 sessions from 30 subjects. No statistical method was used to predetermine sample size. Instead, sample sizes were determined based on typical sample sizes in the field that are deemed sufficient for statistical analyses (e.g., Norman et al., Science, 2019; Qasim et al., Nature Neuroscience, 2019; Kutter et al., Neuron, 2018; Rutishauser et al., Nature, 2010). See the Methods for details. |
| Data exclusions | No data were excluded. See also "Population characteristics" above.                                                                                                                                                                                                                                                                                                                                                                                                                                                                                                                        |
| Replication     | All analyses were performed on the entire available data and significant effects replicated across the underlying samples. No separate replication study was performed.                                                                                                                                                                                                                                                                                                                                                                                                                    |
| Randomization   | All subjects were in the same experimental group and no randomization of the subjects was required.                                                                                                                                                                                                                                                                                                                                                                                                                                                                                        |

## Blinding

Subjects were not aware of the goals of the study. There was no subjective measurement or decision that the investigator needed to make during the experiment. All data were analyzed off-line. Data collection and analyses were not performed blind to the conditions of the experiments as conditional information was required for further analyses.

## Reporting for specific materials, systems and methods

We require information from authors about some types of materials, experimental systems and methods used in many studies. Here, indicate whether each material, system or method listed is relevant to your study. If you are not sure if a list item applies to your research, read the appropriate section before selecting a response.

### Materials & experimental systems

| n/a                                 | Included in the study                                  |
|-------------------------------------|--------------------------------------------------------|
| <input checked="" type="checkbox"/> | <input type="checkbox"/> Antibodies                    |
| <input checked="" type="checkbox"/> | <input type="checkbox"/> Eukaryotic cell lines         |
| <input checked="" type="checkbox"/> | <input type="checkbox"/> Palaeontology and archaeology |
| <input checked="" type="checkbox"/> | <input type="checkbox"/> Animals and other organisms   |
| <input checked="" type="checkbox"/> | <input type="checkbox"/> Clinical data                 |
| <input checked="" type="checkbox"/> | <input type="checkbox"/> Dual use research of concern  |

### Methods

| n/a                                 | Included in the study                                      |
|-------------------------------------|------------------------------------------------------------|
| <input checked="" type="checkbox"/> | <input type="checkbox"/> ChIP-seq                          |
| <input checked="" type="checkbox"/> | <input type="checkbox"/> Flow cytometry                    |
| <input type="checkbox"/>            | <input checked="" type="checkbox"/> MRI-based neuroimaging |

## Magnetic resonance imaging

### Experimental design

|                                 |                                                                                                                        |
|---------------------------------|------------------------------------------------------------------------------------------------------------------------|
| Design type                     | MRI were acquired purely for clinical purposes to indicate electrode placement, and were not a part of the experiment. |
| Design specifications           | MRI were acquired purely for clinical purposes to indicate electrode placement, and were not a part of the experiment. |
| Behavioral performance measures | MRI were acquired purely for clinical purposes to indicate electrode placement, and were not a part of the experiment. |

### Acquisition

|                               |                                                                                                                                                                                                                                                                                                                       |
|-------------------------------|-----------------------------------------------------------------------------------------------------------------------------------------------------------------------------------------------------------------------------------------------------------------------------------------------------------------------|
| Imaging type(s)               | Structural MRI.                                                                                                                                                                                                                                                                                                       |
| Field strength                | 3T before electrode implantation; 1.5T after electrode implantation.                                                                                                                                                                                                                                                  |
| Sequence & imaging parameters | Pre-implant 3D T1-weighted MPRAGE (Siemens Prisma, Germany): TR 2,000 ms; TE 2.26 ms; flip angle 12; 1 mm isotropic resolution; 256 x 256 x 160 matrix.<br>Post-implant 3D T1-weighted MPRAGE (Siemens Avanto, Germany): TR 1,300 ms; TE 2.33 ms; flip angle 15; 0.5 x 0.5 x 1 mm resolution; 512 x 512 x 176 matrix. |
| Area of acquisition           | Whole brain.                                                                                                                                                                                                                                                                                                          |
| Diffusion MRI                 | <input type="checkbox"/> Used <input checked="" type="checkbox"/> Not used                                                                                                                                                                                                                                            |

### Preprocessing

|                            |                                                                                              |
|----------------------------|----------------------------------------------------------------------------------------------|
| Preprocessing software     | SPM ( <a href="https://www.fil.ion.ucl.ac.uk/spm/">https://www.fil.ion.ucl.ac.uk/spm/</a> ). |
| Normalization              | Normalization was performed using SPM.                                                       |
| Normalization template     | Normalization was performed using the SPM template.                                          |
| Noise and artifact removal | No noise or artifact removal was used.                                                       |
| Volume censoring           | No volume censoring was used.                                                                |

### Statistical modeling & inference

|                           |                                                                                                                         |
|---------------------------|-------------------------------------------------------------------------------------------------------------------------|
| Model type and settings   | No statistical modeling was used as MRI scans were only acquired for clinical purposes to indicate electrode placement. |
| Effect(s) tested          | No effects were tested as MRI scans were only acquired for clinical purposes to indicate electrode placement.           |
| Specify type of analysis: | <input checked="" type="checkbox"/> Whole brain <input type="checkbox"/> ROI-based <input type="checkbox"/> Both        |

Statistic type for inference  
(See [Eklund et al. 2016](#))

No statistical analyses were performed.

Correction

No statistical analyses were performed and no correction was applied.

## Models & analysis

- | n/a                                 | Involvement in the study                                              |
|-------------------------------------|-----------------------------------------------------------------------|
| <input checked="" type="checkbox"/> | <input type="checkbox"/> Functional and/or effective connectivity     |
| <input checked="" type="checkbox"/> | <input type="checkbox"/> Graph analysis                               |
| <input checked="" type="checkbox"/> | <input type="checkbox"/> Multivariate modeling or predictive analysis |
